# Supplementary material
Source: PubMed Central journal article supplement (PMC275476)
Supplement: nar_31_21_6272__1.pdf [file nar_31_21_6272__1.pdf]

| Nb | NotI site                            | Insertions  | EcoRI site                          | Δ      |
|----|--------------------------------------|-------------|-------------------------------------|--------|
|    | <b>Clones</b>                        | <b>from</b> | <b>normal cells</b>                 |        |
|    | TATAGGGCGAATTGGAGCTCCACCGCGGTGGC---- |             | AATTCGATCGGGCCCCCCTCGAGGTCGACCACAGT |        |
|    | ATATCCCCTTAACCTCGAGGTGGCGCCACCGCCGG  |             | ----GCTAGCCCCGGGGGAGCTCCAGCTGGTGTCA |        |
| 1  | TATAGGGCGAATTGGAGCTCCACCGCGGTGGCGGCC |             | AATTCGATCGGGCCCCCCTCGAGGTCGACCACAGT | 0bp    |
| 6  | TATAGGGCGAATTGGAGCTCCACCGCGGTGGCGGCC |             | ---TCGATCGGGCCCCCCTCGAGGTCGACCACAGT | -3bp   |
| 1  | TATAGGGCGAATTGGAGCTCCACCGCGGTGGCGGCC |             | ----CGATCGGGCCCCCCTCGAGGTCGACCACAGT | -4bp   |
| 1  | TATAGGGCGAATTGGAGCTCCACCGCGGTGGCGG-- |             | ---TCGATCGGGCCCCCCTCGAGGTCGACCACAGT | -5bp   |
| 2  | TATAGGGCGAATTGGAGCTCCACCGCGGTGGCGGCC |             | -ATTCGATCGGGCCCCCCTCGAGGTCGACCACAGT | -1bp   |
| 2  | TATAGGGCGAATTGGAGCTCCACCGCGGTGGCG--- | +CCC        | -ATTCGATCGGGCCCCCCTCGAGGTCGACCACAGT | -4bp   |
| 2  | TATAGGGCGAATTGGAGCTCCACCGCGGTGGCGGCC |             | -----ATCGGGCCCCCCTCGAGGTCGACCACAGT  | -6bp   |
| 1  | TATAGGGCGAATTGGAGCTCCACCGCGGTGGC---- |             | ---TCGATCGGGCCCCCCTCGAGGTCGACCACAGT | -7bp   |
| 2  | TATAGGGCGAATTGGAGCTCCACCGCGGTGGCGGCC |             | -----CGGGCCCCCCTCGAGGTCGACCACAGT    | -8bp   |
| 1  | TATAGGGCGAATTGGAGCTCCACCGCGGTGGCGGCC |             | -----GGGCCCCCCTCGAGGTCGACCACAGT     | -9bp   |
| 1  | TATAGGGCGAATTGGAGCTCCACCGCGGT-----   |             | --TTCGATCGGGCCCCCCTCGAGGTCGACCACAGT | -9bp   |
| 1  | TATAGGGCGAATTGGAGCTCCACCGCGGTGGC---- |             | ----GATCGGGCCCCCCTCGAGGTCGACCACAGT  | -9bp   |
| 2  | TATAGGGCGAATTGGAGCTCCACCGCGGTGGCG--- | +CC         | -----TCGGGCCCCCCTCGAGGTCGACCACAGT   | -10bp  |
| 2  | TATAGGGCGAATTGGAGCTCCACCGCGGTGGC---- |             | -----ATCGGGCCCCCCTCGAGGTCGACCACAGT  | -10bp  |
| 1  | TATAGGGCGAATTGGAGCTCCACCGCGGTGGCG--- |             | -----GGGCCCCCCTCGAGGTCGACCACAGT     | -12bp  |
| 1  | TATAGGGCGAATTGGAGCTCCACCGCGGTGGCG--- |             | -----GGCCCCCCTCGAGGTCGACCACAGT      | -13bp  |
| 1  | TATAGGGCGAATTGGAGCTCCACCGCGGTG-----  |             | -----CGGGCCCCCCTCGAGGTCGACCACAGT    | -14bp  |
| 1  | TATAGGGCGAATTGGAGCTCCAC-----         |             | -ATTCGATCGGGCCCCCCTCGAGGTCGACCACAGT | -14bp  |
| 1  | TATAGGGCGAATTGGAGCTCCACCG-----       |             | ----CGATCGGGCCCCCCTCGAGGTCGACCACAGT | -15bp  |
| 1  | TATAGGGCGAATTGGAGCTCCACCGCG-----     |             | -----CGGGCCCCCCTCGAGGTCGACCACAGT    | -16bp  |
| 3  | TATAGGGCGAATTGGAGCTCCACCGCG-----     |             | -----CGGGCCCCCCTCGAGGTCGACCACAGT    | -17bp  |
| 1  | TATAGGGCGAATTGGAGCTCCACCGCGGTG-----  |             | -----GCCCCCCCCTCGAGGTCGACCACAGT     | -17bp  |
| 1  | TATAGGGCGAATTGGAGCTCCA-----          |             | -----CGGGCCCCCCTCGAGGTCGACCACAGT    | -22bp  |
| 1  | TATAGGGCGAATTGGAGCTCCA-----          |             | -----TCGACCACAGT                    | -39bp  |
| 1  | TATAGGGCGAATTGGAGCTCC-----           | +GCCGCCAGC  | -----GGTCGACCACAGT                  | -48bp  |
| 2  | TATAGGGCGAATTGGAGCTCCACCGCGGTGGCGGCC |             | -----                               | -69bp  |
| 1  | TATAGGGCGAATTGGAGCTCCACCGCGGTGGCGG-- |             | -----                               | -78bp  |
| 1  | -----                                |             | -----GCCCCCCCCTCGAGGTCGACCACAGT     | -110bp |
| 1  | -----                                |             | -----CCCCCTCGAGGTCGACCACAGT         | -119bp |
| 1  | -----                                |             | -----CCCCCTCGAGGTCGACCACAGT         | -160bp |
| 1  | TATAGGGCGAATTGGA-----                |             | -----                               | -190bp |
| 1  | TATAGGGCGAATTGGAGCTCCACCGCGGTGGCG--- |             | -----                               | -216bp |
|    | <b>Clones</b>                        | <b>from</b> | <b>BS cells</b>                     |        |
| 2  | TATAGGGCGAATTGGAGCTCCACCGCGGTGGCGGCC |             | AATTCGATCGGGCCCCCCTCGAGGTCGACCACAGT | 0bp    |
| 2  | TATAGGGCGAATTGGAGCTCCACCGCGGTGGCGGCC |             | ---TCGATCGGGCCCCCCTCGAGGTCGACCACAGT | -3bp   |
| 2  | TATAGGGCGAATTGGAGCTCCACCGCGGTGGCGGCC |             | ----CGATCGGGCCCCCCTCGAGGTCGACCACAGT | -4bp   |
| 4  | TATAGGGCGAATTGGAGCTCCACCGCGGTGGCGG-- |             | ---TCGATCGGGCCCCCCTCGAGGTCGACCACAGT | -5bp   |
| 1  | TATAGGGCGAATTGGAGCTCCACCGCGGTGGCGGC- |             | -ATTCGATCGGGCCCCCCTCGAGGTCGACCACAGT | -2bp   |
| 2  | TATAGGGCGAATTGGAGCTCCACCGCGGTGGC---- |             | AATTCGATCGGGCCCCCCTCGAGGTCGACCACAGT | -4bp   |
| 2  | TATAGGGCGAATTGGAGCTCCACCGCGGTGGCGGC- |             | ---TCGATCGGGCCCCCCTCGAGGTCGACCACAGT | -4bp   |
| 1  | TATAGGGCGAATTGGAGCTCCACCGCGGTGGCGGC- |             | ----CGATCGGGCCCCCCTCGAGGTCGACCACAGT | -5bp   |
| 1  | TATAGGGCGAATTGGAGCTCCACCGCGGTGGCG--- |             | ---TCGATCGGGCCCCCCTCGAGGTCGACCACAGT | -6bp   |
| 2  | TATAGGGCGAATTGGAGCTCCACCGCGGTGGCGG-- |             | ----CGATCGGGCCCCCCTCGAGGTCGACCACAGT | -6bp   |
| 1  | TATAGGGCGAATTGGAGCTCCACCGCGGTGGC---- |             | --TTCGATCGGGCCCCCCTCGAGGTCGACCACAGT | -6bp   |
| 4  | TATAGGGCGAATTGGAGCTCCACCGCGGTGGCG--- |             | ----GATCGGGCCCCCCTCGAGGTCGACCACAGT  | -8bp   |
| 1  | TATAGGGCGAATTGGAGCTCCACCGCG-----     |             | AATTCGATCGGGCCCCCCTCGAGGTCGACCACAGT | -9bp   |
| 1  | TATAGGGCGAATTGGAGCTCCACCGCGGTGGCGGC- |             | -----CGGGCCCCCCTCGAGGTCGACCACAGT    | -9bp   |
| 1  | TATAGGGCGAATTGGAGCTCCACCGCGGTGGCGG-- |             | -----CGGGCCCCCCTCGAGGTCGACCACAGT    | -10bp  |
| 1  | TATAGGGCGAATTGGAGCTCCA-----          | +CG         | -ATTCGATCGGGCCCCCCTCGAGGTCGACCACAGT | -15bp  |
| 2  | TATAGGGCGAATTGGAGCTCCACC-----        |             | ----CGATCGGGCCCCCCTCGAGGTCGACCACAGT | -16bp  |
| 1  | TATAGGGCGAATTGGAGCTCCACCG-----       |             | ----GATCGGGCCCCCCTCGAGGTCGACCACAGT  | -16bp  |
| 1  | TATAGGGCGAATTG-----                  | +GTGGC      | ----GATCGGGCCCCCCTCGAGGTCGACCACAGT  | -27bp  |
| 1  | TATAGGGCGAATTGGAGCTCCACCGCGGTG-----  |             | -----GATCGGGCCCCCCTCGAGGTCGACCACAGT | -31bp  |
| 1  | TATAGGGCGAATTGGAGC-----              |             | -----CCCCCTCGAGGTCGACCACAGT         | -31bp  |
| 1  | TATAGGGCGAATTGGAG-----               |             | -----CCCCCTCGAGGTCGACCACAGT         | -31bp  |
| 1  | TATAGGGCGAATTGGAGC-----              |             | -----CCCTCGAGGTCGACCACAGT           | -34bp  |
| 1  | TATAGG-----                          |             | -----GCCCCCCCCTCGAGGTCGACCACAGT     | -41pb  |
| 1  | TATAGGGCGAATTGG-----                 |             | -----CGACCACAGT                     | -47pb  |
| 2  | -----                                | +CCTCCACTG  | -----TCGAGGTCGACCACAGT              | -62bp  |
| 1  | TATAGGGCGAATTGGAGC-----              |             | -----                               | -243bp |
| 1  | TATAGGGCGAATTG-----                  |             | -----                               | -244bp |
| 1  | TATAGGGCGAATTG-----                  |             | -----                               | -358bp |

### Supplementary material 1: Sequence analysis of the *EcoRI-NotI* DSBs repaired by NHEJ.

Forty-six and forty-three PCR products repaired by NHEJ, from normal (upper panels) and BS (lower panels) cells, respectively, were subjected to sequence analysis. The “Nb” column shows the number of clones with a given sequence recovered from either normal or BS cells. The “*NotI* site” and “*EcoRI* site” columns show all the sequences of the *NotI* and *EcoRI* sides of the DSB, respectively, that have been found. The middle column (Insertions) shows the bases that have been added at the *NotI-EcoRI* junction. The Δ column shows the total number of bp that have been deleted at the *NotI-EcoRI* junction.
